# Supplementary material for: Oxidative Stress Is Associated with Telomere Interaction Impairment and Chromatin Condensation Defects in Spermatozoa of Infertile Males
Source: PubMed Central journal article supplement (PMC8069055; doi:10.3390/antiox10040593), 2021-04-12
Supplement: antioxidants-10-00593-s001.pdf [file antioxidants-10-00593-s001.pdf]

**Table S1.** Semen parameters in control group for males who achieved pregnancy before sperm sampling.

| Semen Parameters                                                 | Control Group               |         |                                |       |
|------------------------------------------------------------------|-----------------------------|---------|--------------------------------|-------|
|                                                                  | With Child<br><i>n</i> = 12 |         | Without Child<br><i>n</i> = 10 |       |
|                                                                  | mean ± s.d                  |         |                                |       |
| <b>Sexual abstinence</b><br>(days)                               | 5.7                         | ± 2.0   | 5.4                            | ±2.3  |
| <b>Volume</b><br>(mL)                                            | 4.5                         | ± 2.4   | 4.2                            | ±1.1  |
| <b>Concentration</b><br>(10 <sup>6</sup> /mL)                    | 51.4                        | ± 24.1  | 43.2                           | ±15.7 |
| <b>Total sperm number</b><br>(10 <sup>6</sup> /ejaculate)        | 214.1                       | ± 124.4 | 177.9                          | ±68.1 |
| <b>Sperm progressive motility</b><br>(a + b, %)                  | 39.2                        | ± 5.2   | 42.0                           | ±5.9  |
| <b>Vitality</b><br>(live spermatozoa, %)                         | 80.4                        | ± 6.2   | 79.0                           | ±7.0  |
| <b>Normal sperm morphology</b><br>(%)                            | 47.2                        | ± 14.6  | 51.3                           | ±10.9 |
| <b>Round cells</b><br>(10 <sup>6</sup> round cells/mL)           | 0.3                         | ± 0.5   | 0.3                            | ±0.7  |
| <b>Leukocytospermia</b><br>(10 <sup>6</sup> leukocytes/mL)       | 0.05                        | ± 0.1   | 0.2                            | ±0.5  |
| <b>Cytoplasmic ROS</b><br>(%)                                    | 10.6                        | ± 7.7   | 8.0                            | ±7.2  |
| <b>Nuclear ROS</b><br>(%)                                        | 25.3                        | ± 13.0  | 27.7                           | ±14.2 |
| <b>8-OHdG positive spz</b><br>(%)                                | 3.3                         | ± 2.6   | 2.6                            | ±1.9  |
| <b>DNA fragmentation</b><br>(%)                                  | 8.1                         | ± 6.3   | 6.0                            | ±4.0  |
| <b>Total chromosome abnormalities</b><br>(%)                     | 0.85                        | ± 0.5   | 0.7                            | ±0.3  |
| <b>Abnormal chromatin condensation</b><br>(%)                    | 10.2                        | ± 4.8   | 8.3                            | ±3.2  |
| <b>Mean number of telomeres</b><br>(fluorescent signals per spz) | 19.0                        | ± 2.8   | 18.6                           | ±3.4  |
| <b>Relative telomere length</b><br>(FRU)                         | 57.3                        | ± 13.7  | 59.2                           | ±30.4 |

8-OHdG: 8-Oxo-deoxyGuanosine; FRU: fluorescence relative units; *n*: number; ROS: reactive oxygen species; s.d: standard deviation; spz: spermatozoa; %: percent.
